# Supplementary material
Source: publisher figshare collection journal article supplement (https://frontiersin.figshare.com/ndownloader/files/24744665)
Supplement: Supplementary file [file 24744665]

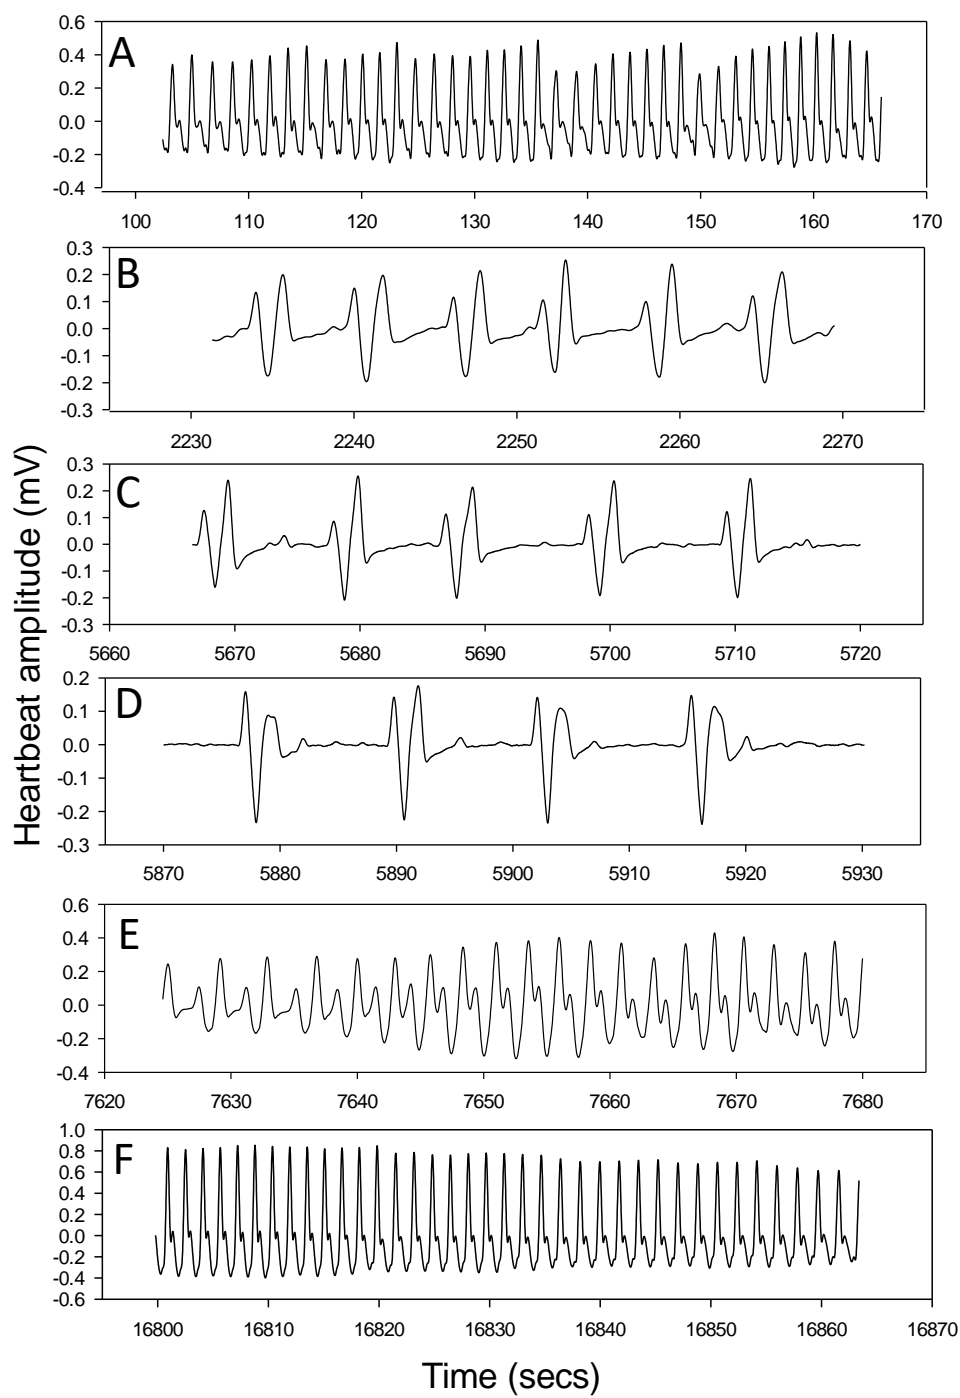

**Supplementary Figure 2.** Cardiograms of a single snail before, during and after exposure to hypoxic seawater. (A), (B), (E) and (F), normoxia; (C), hypoxia 2.3 mg.L<sup>-1</sup>; (D), hypoxia 1.5 mg.L<sup>-1</sup>. Heart beat periodicity was maintained throughout the experiment, including during bradycardia. Bradycardia was induced during initial normoxia, and heart beat recovered during hypoxia at O<sub>2</sub> concentrations of 2.3 mg.L<sup>-1</sup>, but not during 1.5 mg.L<sup>-1</sup> O<sub>2</sub> concentration. Note the relatively high amplitude in (F) is consistent with a larger stroke volume and repayment of O<sub>2</sub>-debt.
